# Supplementary material for: Avoidance Of Rejuvenation: A Stress Test For Evolutionary Theories Of Aging
Source: Research Square preprint supplement (doi:10.21203/rs.3.rs-7898466/v1), 2025-11-17
Supplement: Supplementary file 1 [file b999adf82b62428157438b46.docx]

**Avoidance Of Rejuvenation: A Stress Test For Evolutionary Theories Of Aging**

Samir Aisin1, Boris V. Lidskii2*, Peter V Lidsky1*

1 Department of Biomedical Sciences, College of Biomedicine, City University of Hong Kong, Tat Chee Ave, Kowloon, Hong Kong SAR

2 N.N. Semenov Federal Research Centre of Chemical Physics, Russian Academy of Sciences, Moscow, 119991, Russia

**Supplementary materials**

**Supplementary material I.**

**Model I. Investment in maintenance is constant.**

– age of the forager

– age-independent mortality per day; exp(-μt) - survival as a function of age t

– quantity of new foragers born per day

– quantity of foragers of age ;

– total number of foragers within the colony

C – energy needed to produce one forager, e.g., required to feed the larva.

– energy that a forager consumes daily to do its work

– the daily damage a forager receives, expressed in the energy equivalent;

– energy investment into repairing the damages; - daily unrepaired damage
 – the proportion of molecules sufficient to cause death if damaged; if unrepaired damage exceeds , the forager dies.

– maximum intrinsic lifespan, days

1. – maximum longevity, dimensionless value

– production of the first foragers
 – production of the th forager

– maximum production of all foragers under any

– reproduction fitness

There must be optimal and resulting in maximum .


Therefore:

1. = S0 ∙ exp(-mS0n)

As , there is an equation

Let us declare dimensionless parameters: λ = ; γ = ;

Therefore

Let assign η = λ + and insert the equation for N into equation (9) that defines W.

We would receive:

1. W = (1 - η+ η ∙ ln(η))

To find optimal values warranting maximal fitness, we need to solve the equation

However, = . Therefore, we solve the equation .

1. = - ∙

After multiplying the two parts on , the equation takes the final form:


**Supplementary material II.**

**Model II. Investment in maintenance is variable.**

The expression (1) for X now becomes:


Now the total compensation for bees is instead of is


Therefore:


Here, we used the equation:


M(t) must be chosen in a way that:

is constant, while must be as low as possible.

Let define:

; so

Applying this to equation 17 brings us to:

1. - N

From it turns out:


Here

Let’s define the right part of the equation as η. Therefore:

Therefore:

As = ; and

1. = < 0

then , an increase in should always increase the colony fitness , and death by old age should never be observed.

**Supplementary material III.**

**Model III. Infections provide selective pressure for limiting lifespan.**

- quantity of infected foragers. Infected individuals do not contribute to foraging but consume resources as uninfected colony members ():

The probability of being infected per day is - β.

The working bees are being infected or dying with the probability:

1. + , where .

   We suppose that:
2. -

as in Model I. Therefore:

1. + =  =
2. =  =

Receiving the equation for :


This equation always has a solution

Let's assign the right part of the equation as . When the values of are big:

If , under small values and the equation’s solution under exists.

However, could be considered as an equation on . Its solution is the value of under which the infection cannot propagate, as an average forager infects less than one healthy forager per lifespan ().

The final equation is:

1. -

The stationary solution exists if a constant .
